# Supplementary material for: Studies on the catalytic domains of multiple JmjC oxygenases using peptide substrates
Source: PubMed Central journal article supplement (PMC4623018; doi:10.4161/15592294.2014.983381), 2015-01-27
Supplement: kepi-09-12-983381-s001.pdf [file kepi-09-12-983381-s001.pdf]

## Supporting Information

### Studies on the Catalytic Domains of Multiple JmjC Oxygenases Using Peptide Substrates

Ms Sophie T. Williams<sup>+,1</sup>, Dr Louise J. Walport<sup>+,1</sup>, Dr Richard J. Hopkinson<sup>+,1</sup>, Miss Sarah K. Madden,<sup>1</sup> Dr Rasheduzzaman Chowdhury,<sup>1</sup> Prof. Christopher J. Schofield FRS<sup>1</sup> and Dr Akane Kawamura<sup>1,2\*</sup>

<sup>1</sup> Chemistry Research Laboratory, 12 Mansfield Road, Oxford, OX1 3TA, UK.

<sup>2</sup> Radcliffe Department of Medicine, Division of Cardiovascular Medicine, Wellcome Trust Centre for Human Genetics, Roosevelt Drive, Oxford, OX3 7BN, UK.

<sup>+</sup> These authors have contributed equally to the work

<sup>\*</sup> Correspondence to Dr Akane Kawamura, email: akane.kawamura@chem.ox.ac.uk.

#### Figures and Tables.

Note: negative data is not shown for all methylation marks for all enzymes, but is included for enzymes where there have been discrepancies in the literature.

**Table S1. Peptide sequences used in MALDI and FDH activity assays.** Residues which are enzymatically oxidised (hydroxylated or demethylated) are shown in bold. All peptides were purchased from Alta Bioscience or synthesised in house on a CSBio 336X solid phase peptide synthesiser. Ahx is aminohexanoic acid. All Alta Bioscience peptides have a C-terminal amide. Small differences in the masses of peptides are observed in the MALDI-TOF spectra due to calibration. Oxidation (+16 Da) of some biotinylated peptides was observed in the mass spectra in some instances.

| <b>Histone Mark / Protein</b> | <b>Amino Acid Sequence</b>                     | <b>Average Mass / Da</b> | <b>Source</b>   |
|-------------------------------|------------------------------------------------|--------------------------|-----------------|
| H3K4                          | Biotin-Ahx-ART <b>Kme1</b> QTARKSTGGKAPRKQLA   | 2607.5                   | Alta Bioscience |
| H3K4                          | Biotin- Ahx -ART <b>Kme2</b> QTARKSTGGKAPRKQLA | 2621.5                   | Alta Bioscience |
| H3K4                          | Biotin- Ahx -ART <b>Kme3</b> QTARKSTGGKAPRKQLA | 2635.5                   | Alta Bioscience |
| H3K9                          | Biotin- Ahx -ARTKQTAR <b>Kme1</b> STGGKAPRKQLA | 2607.5                   | Alta Bioscience |
| H3K9                          | Biotin- Ahx -ARTKQTAR <b>Kme2</b> STGGKAPRKQLA | 2621.5                   | Alta Bioscience |
| H3K9                          | Biotin- Ahx -ARTKQTAR <b>Kme3</b> STGGKAPRKQLA | 2635.5                   | Alta Bioscience |
| H3K27                         | Biotin- Ahx -KAPRKQLATKAAR <b>Kme1</b> SAPATGG | 2461.3                   | Alta Bioscience |
| H3K27                         | Biotin- Ahx -KAPRKQLATKAAR <b>Kme2</b> SAPATGG | 2475.3                   | Alta Bioscience |
| H3K27                         | Biotin- Ahx -KAPRKQLATKAAR <b>Kme3</b> SAPATGG | 2489.3                   | Alta Bioscience |
| H3K36                         | Biotin- Ahx -SAPATGGV <b>Kme1</b> KPHRYRPGTVAL | 2516.4                   | Alta Bioscience |
| H3K36                         | Biotin- Ahx -SAPATGGV <b>Kme2</b> KPHRYRPGTVAL | 2531.4                   | Alta Bioscience |
| H3K36                         | Biotin- Ahx -SAPATGGV <b>Kme3</b> KPHRYRPGTVAL | 2545.4                   | Alta Bioscience |
| H3K4                          | ART <b>Kme3</b> QTARKSTGGKAPRKQLA              | 2297.6                   | In house        |
| H3K9                          | ARTKQTAR <b>Kme3</b> STGGKAPRKQLA              | 2297.6                   | In house        |
| H3K27                         | KAPRKQLATKAAR <b>Kme3</b> SAPATGG              | 2151.1                   | In house        |
| H3K36                         | SAPATGGV <b>Kme3</b> KPHRYRPGTVAL              | 2206.5                   | In house        |
| Rpl27a                        | GRGNAGGL <b>HHHR</b> INFDKYHP                  | 2281.1                   | In house        |
| Rpl8                          | NPVEHPFGGG <b>NHQH</b> IGKPST                  | 2110.3                   | In house        |
| Synthetic ankyrin             | HLEVVKLLLEAGADV <b>NAQDK</b>                   | 2161.2                   | In house        |

**Table S2. Demethylation assay conditions.**

| <b>Enzyme</b> | <b>[2OG] /<br/>μM</b> | <b>[Ascorbate] /<br/>μM</b> | <b>[Fe<sup>II</sup>] /<br/>μM</b> | <b>Buffer Conditions</b>                                  |
|---------------|-----------------------|-----------------------------|-----------------------------------|-----------------------------------------------------------|
| KDM2A         | 200                   | 100                         | 10                                | 50 mM HEPES pH 7.5                                        |
| KDM3A         | 200                   | 100                         | 10                                | 50 mM HEPES pH 7.5, 150 mM NaCl                           |
| KDM4A-E       | 200                   | 100                         | 10                                | 50 mM HEPES pH 7.5                                        |
| KDM5C         | 200                   | 100                         | 10                                | 50 mM HEPES pH 7.5                                        |
| KDM6A         | 200                   | 100                         | 10                                | 50 mM HEPES pH 7.5, 150 mM NaCl, 5% glycerol              |
| KDM6B         | 200                   | 100                         | 10                                | 50 mM HEPES pH 7.5, 150 mM NaCl, 5% glycerol              |
| KDM7A         | 200                   | 100                         | 10                                | 50 mM HEPES pH 7.5                                        |
| JMJD5         | 200                   | 100                         | 10                                | 50 mM HEPES pH 7.5, 150 mM NaCl, 5% glycerol,<br>1 mM DTT |
| MINA53        | 200                   | 100                         | 10                                | 50 mM HEPES pH 7.5, 150 mM NaCl, 5% glycerol,<br>1 mM DTT |
| NO66          | 200                   | 100                         | 10                                | 50 mM HEPES pH 7.5, 150 mM NaCl, 5% glycerol,<br>1 mM DTT |
| FIH           | 200                   | 100                         | 10                                | 50 mM Tris pH 7.5, 150 mM NaCl                            |

**Table S3. Crystallographic data processing and refinement statistics.** Sample composition of 1(KDM4A):5(NOG):peptide(10) was used, with KDM4A<sup>1</sup> at 10mg/ml.

| Measurement                                          | KDM4A + 20 mer H3K27me3 Peptide<br>PDB ID: 4V2W                                           | KDM4A + 5 mer H3K27me3 Peptide<br>PDB ID: 4V2V             |
|------------------------------------------------------|-------------------------------------------------------------------------------------------|------------------------------------------------------------|
| <b><u>Crystallization and cryo-protection</u></b>    |                                                                                           |                                                            |
| Crystallization conditions                           | 0.02 M sodium/potassium phosphate,<br>0.1 M Bis Tris propane pH 7.5,<br>20 % w/v PEG 3350 | 0.2 M ammonium chloride,<br>20 % w/v PEG 3350              |
| Vapour diffusion conditions                          | Sitting drop (300 nl),<br>protein-to-well ratio, 2:1, 277K                                | Sitting drop (300 nl),<br>protein-to-well ratio, 1:1, 277K |
| Cryo-protection (% supplemented with well condition) | 25% glycerol                                                                              | 25% glycerol                                               |
| <b><u>Data Collection</u></b>                        |                                                                                           |                                                            |
| Data processing                                      | MOSFLM <sup>2</sup> , SCALA <sup>3</sup>                                                  | MOSFLM <sup>2</sup> , SCALA <sup>3</sup>                   |
| Space Group                                          | <i>P</i> 2 <sub>1</sub> 2 <sub>1</sub> 2                                                  | <i>P</i> 2 <sub>1</sub> 2 <sub>1</sub> 2                   |
| Cell dimensions a,b,c (Å)                            | 100.66                                                                                    | 101.02                                                     |
|                                                      | 149.73                                                                                    | 149.91                                                     |
|                                                      | 57.50                                                                                     | 57.38                                                      |
| Resolution (Å)                                       | 60.07 – 1.81 (1.91 – 1.81)*                                                               | 53.59 – 2.00 (2.11 – 2.00)*                                |
| No. of unique reflections                            | 79999 (11459)*                                                                            | 59803 (8616)*                                              |
| Completeness (%)                                     | 99.9 (99.3)*                                                                              | 100 (100)*                                                 |
| Redundancy                                           | 6.9 (6.2)*                                                                                | 5.8 (5.5)*                                                 |
| R <sub>sym</sub> <sup>**</sup>                       | 0.098 (0.889)*                                                                            | 0.088 (0.786)*                                             |
| Mean I/σ(I)                                          | 9.9 (2.0)*                                                                                | 11.0 (2.2)*                                                |
| <b><u>Refinement</u></b>                             |                                                                                           |                                                            |
| R <sub>factor</sub>                                  | 0.1724                                                                                    | 0.1860                                                     |
| R <sub>free</sub>                                    | 0.2082                                                                                    | 0.2208                                                     |
| R.m.s. deviation                                     |                                                                                           |                                                            |
| Bond length, Å                                       | 0.01                                                                                      | 0.008                                                      |
| Bond angle, °                                        | 1.32                                                                                      | 1.18                                                       |

\*Highest resolution shell shown in parenthesis.

\*\*R<sub>sym</sub> =  $\sum |I - \langle I \rangle| / \sum I$ , where *I* is the intensity of an individual measurement and  $\langle I \rangle$  is the average intensity from multiple observations.

Biotin-Ahx-SAPATGGV**Kme1**KPHRYRPGTVAL  
H3 K36

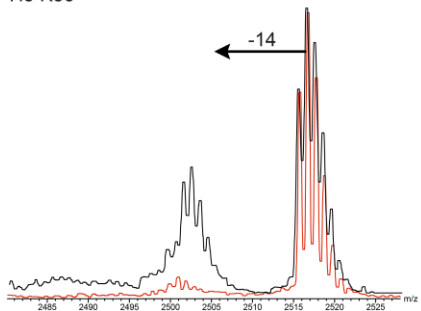

Biotin-Ahx-SAPATGGV**Kme2**KPHRYRPGTVAL  
H3 K36

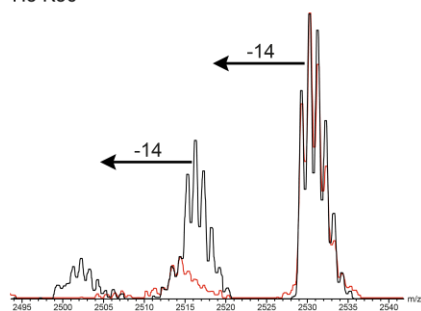

Biotin-Ahx-SAPATGGV**Kme3**KPHRYRPGTVAL  
H3 K36

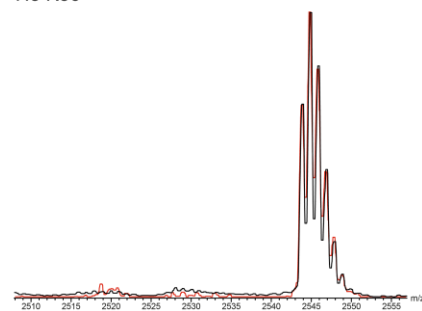

**Figure S1. Representative MALDI MS showing KDM2A-catalysed demethylation of H3 fragment peptides methylated at K36. Peptide only assay (red) overlaid with enzyme reaction (black).**

Biotin-Ahx-ARTKQTARKme1STGGKAPRKQLA  
H3 K9

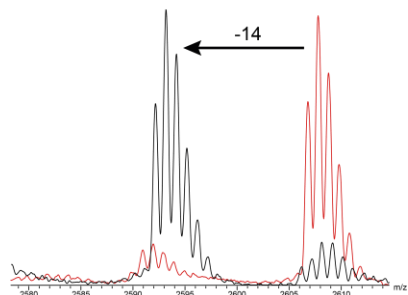

Biotin-Ahx-ARTKQTARKme2STGGKAPRKQLA  
H3 K9

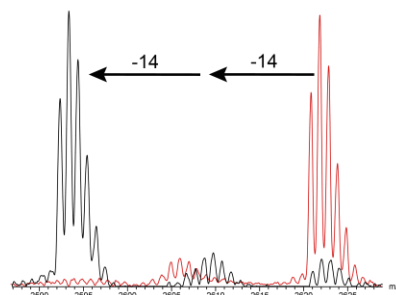

Biotin-Ahx-ARTKQTARKme3STGGKAPRKQLA  
H3 K9

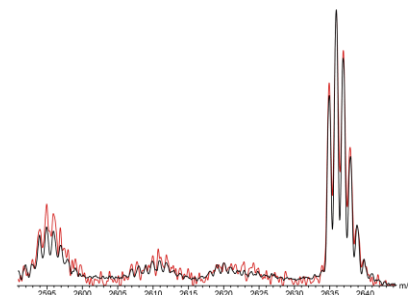

**Figure S2. Representative MALDI MS showing KDM3A-catalysed demethylation of H3 fragment peptides methylated at K9. Peptide only assay (red) overlaid with enzyme reaction (black).**

Biotin-Ahx-ARTKme1QTARKSTGGKAPRKQLA  
H3 K4

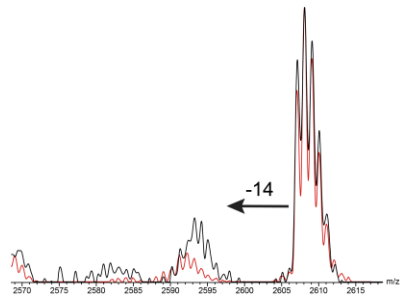

Biotin-Ahx-ARTKme2QTARKSTGGKAPRKQLA  
H3 K4

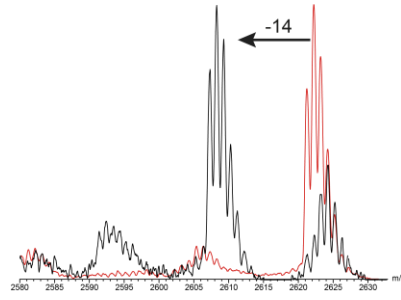

Biotin-Ahx-ARTKme3QTARKSTGGKAPRKQLA  
H3 K4

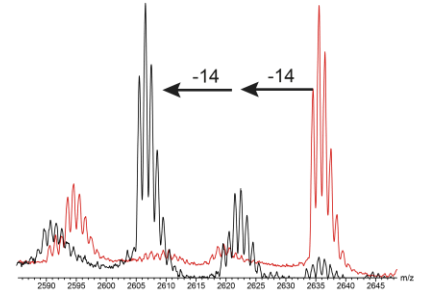

**Figure S3. Representative MALDI MS showing KDM5C-catalysed demethylation of H3 fragment peptides methylated at K4.** Peptide only assay (red) overlaid with enzyme reaction (black).

(A)

Biotin-Ahx-KAPRKQLATKAARKme1SAPATGG  
H3 K27

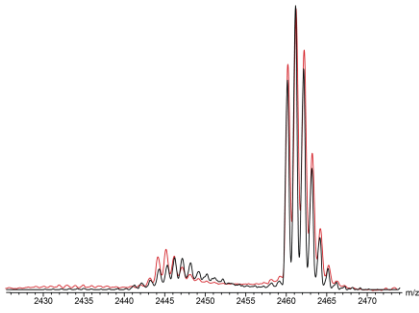

Biotin-Ahx-KAPRKQLATKAARKme2SAPATGG  
H3 K27

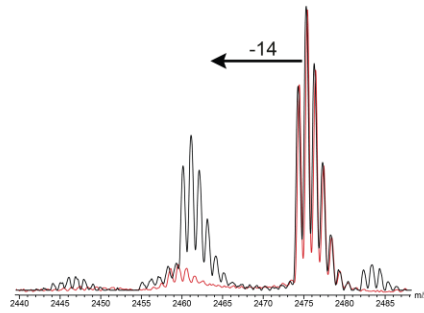

Biotin-Ahx-KAPRKQLATKAARKme3SAPATGG  
H3 K27

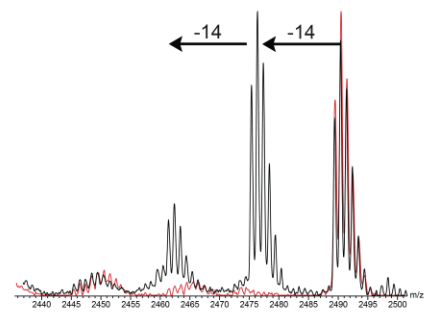

(B)

Biotin-Ahx-KAPRKQLATKAARKme1SAPATGG  
H3 K27

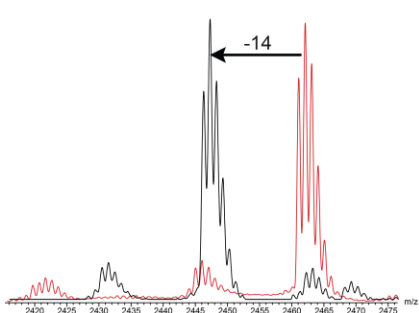

Biotin-Ahx-KAPRKQLATKAARKme2SAPATGG  
H3 K27

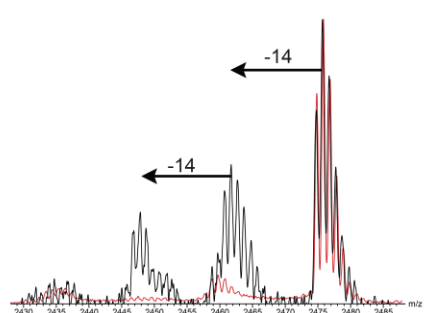

Biotin-Ahx-KAPRKQLATKAARKme3SAPATGG  
H3 K27

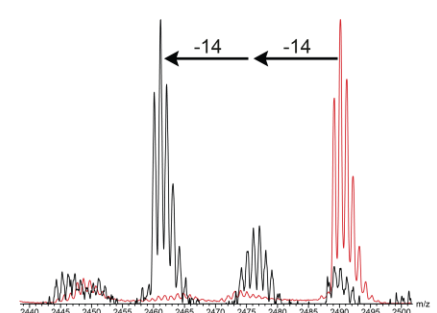

**Figure S4. Representative MALDI MS showing KDM6A (A) and B (B) catalysed demethylation of H3 fragment peptides methylated at K27. Peptide only assay (red) overlaid with enzyme reaction (black).**



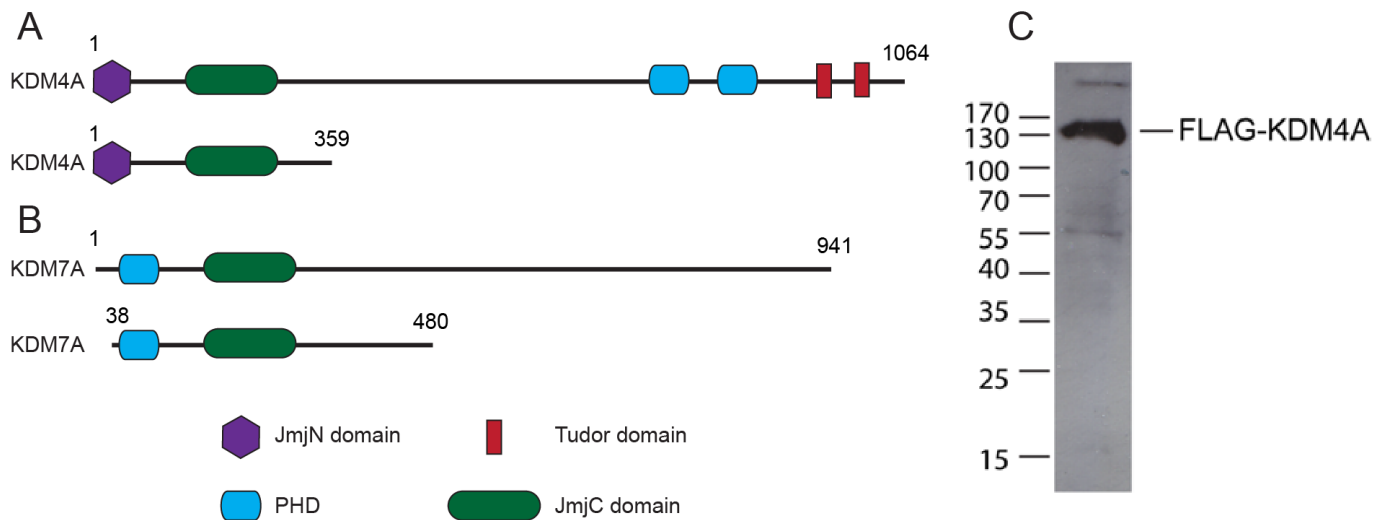

**Figure S5. Domain organisation of (A) KDM4A and (B) KDM7A with (C) Western-Blot analysis of FLAG-KDM4A<sub>1-1064</sub>.** In figures A and B, the upper figure shows the full length protein domain structure (as used for KDM4A), and below shows truncated domain structure in the constructs used for *in vitro* studies (as used for KDM4A and KDM7A). Figure C shows a Western-Blot of immunoprecipitated FLAG-KDM4A 1-1064 purified from HEK293T probed using anti-FLAG antibody. Predicted 3xFLAG-KDM4A weight is 123.4 kDa.

Biotin-Ahx-ARTKQTARKme1STGGKAPRKQLA  
H3 K9

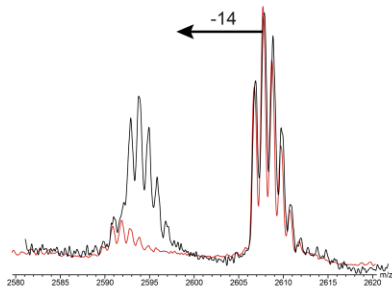

Biotin-Ahx-ARTKQTARKme2STGGKAPRKQLA  
H3 K9

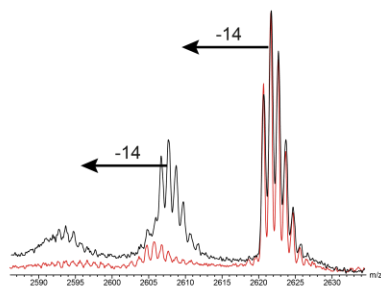

Biotin-Ahx-ARTKQTARKme3STGGKAPRKQLA  
H3 K9

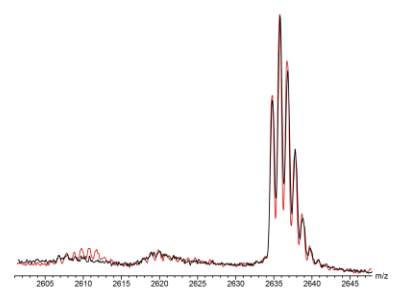

Biotin-Ahx-KAPRKQLATKAARKme1SAPATGG  
H3 K27

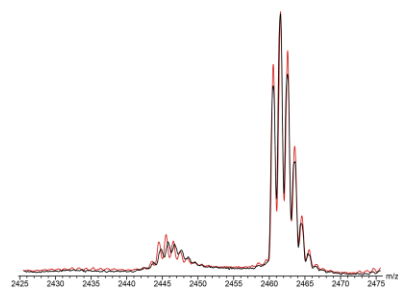

Biotin-Ahx-KAPRKQLATKAARKme2SAPATGG  
H3 K27

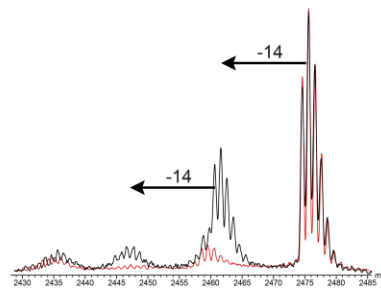

Biotin-Ahx-KAPRKQLATKAARKme3SAPATGG  
H3 K27

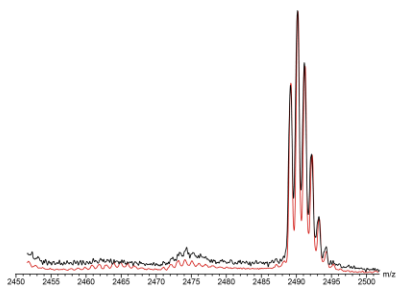

**Figure S6. Representative MALDI MS showing KDM7A catalysed demethylation of H3 fragment peptides methylated at K9 and K27.<sup>5</sup> Peptide only assay (red) overlaid with enzyme reaction (black).**

Biotin-Ahx-ART**Kme1**QTARKSTGGKAPRKQLA  
H3 K4

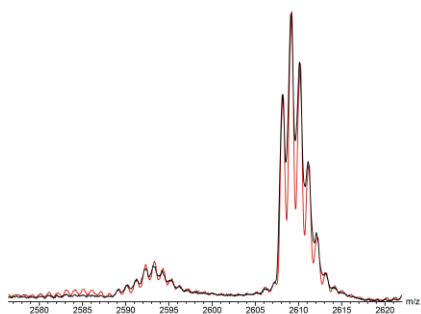

Biotin-Ahx-ART**Kme2**QTARKSTGGKAPRKQLA  
H3 K4

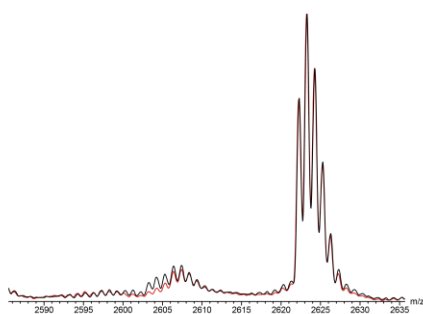

Biotin-Ahx-ART**Kme3**QTARKSTGGKAPRKQLA  
H3 K4

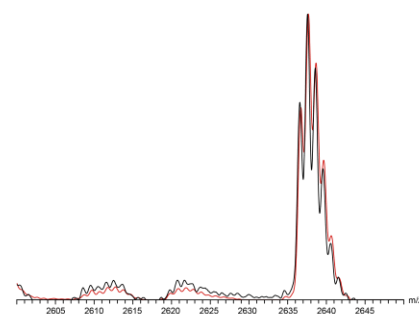

Biotin-Ahx-ARTKQTARK**Kme1**STGGKAPRKQLA  
H3 K9

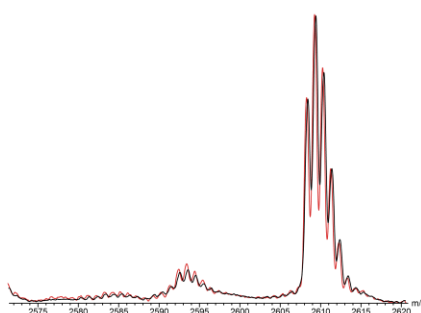

Biotin-Ahx-ARTKQTARK**Kme2**STGGKAPRKQLA  
H3 K9

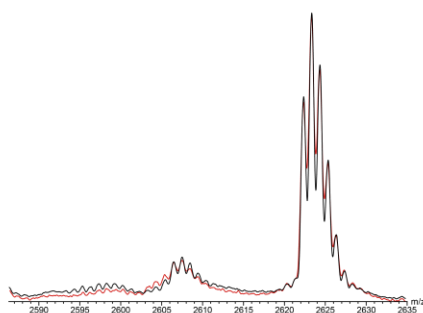

Biotin-Ahx-KAPRKQLATKAAR**Kme1**SAPATGG  
H3 K27

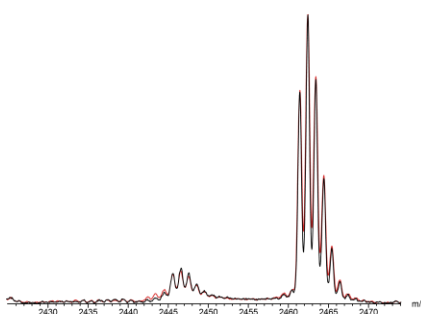

Biotin-Ahx-KAPRKQLATKAAR**Kme2**SAPATGG  
H3 K27

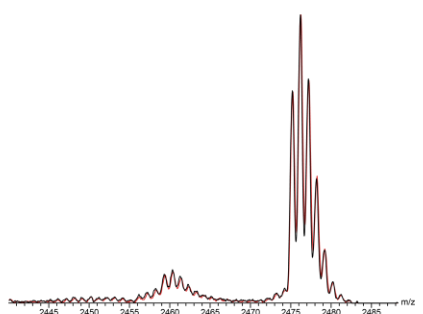

Biotin-Ahx-KAPRKQLATKAAR**Kme3**SAPATGG  
H3 K27

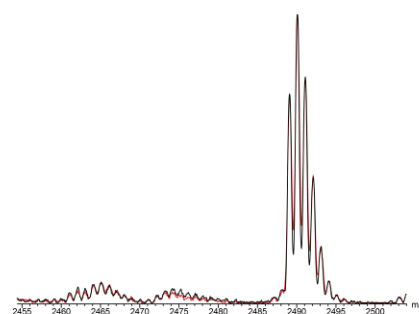

Biotin-Ahx-SAPATGGV**Kme1**KPHRYRPGTVL  
H3 K36

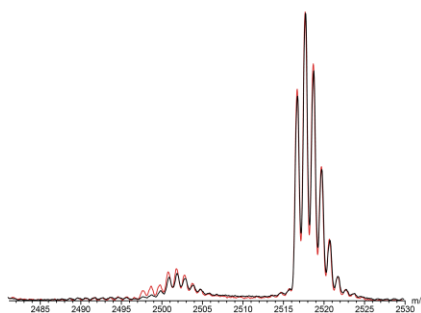

Biotin-Ahx-SAPATGGV**Kme2**KPHRYRPGTVL  
H3 K36

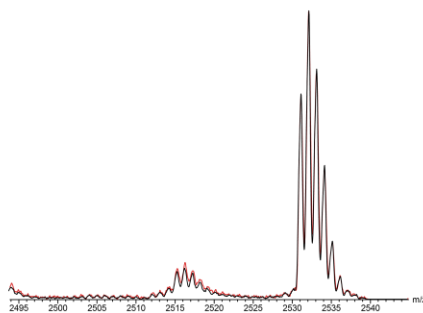

Biotin-Ahx-SAPATGGV**Kme3**KPHRYRPGTVL  
H3 K36

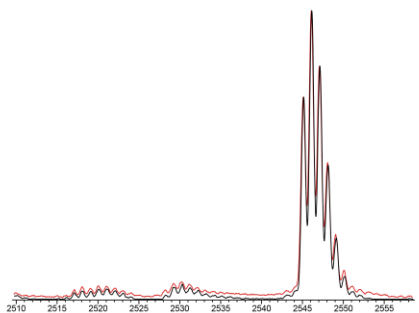

**Figure S7. Representative MALDI MS showing the absence of demethylation of histone peptides by MINA53.<sup>6</sup> Peptide only assay (red) overlaid with enzyme reaction (black).**

Biotin-Ahx-ARTKme1QTARKSTGGKAPRKQLA  
H3 K4

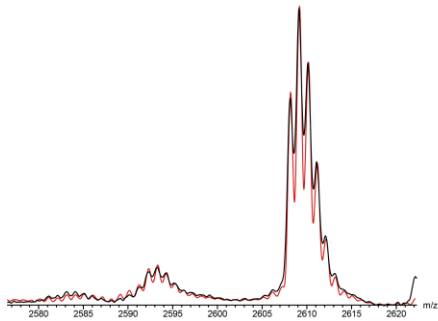

Biotin-Ahx-ARTKme2QTARKSTGGKAPRKQLA  
H3 K4

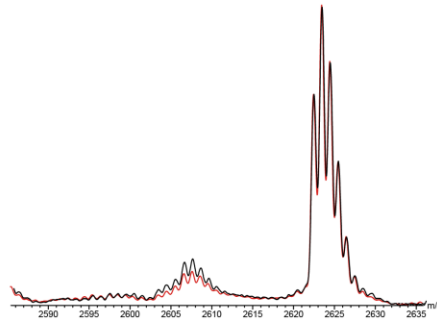

Biotin-Ahx-ARTKme1QTARKSTGGKAPRKQLA  
H3 K4

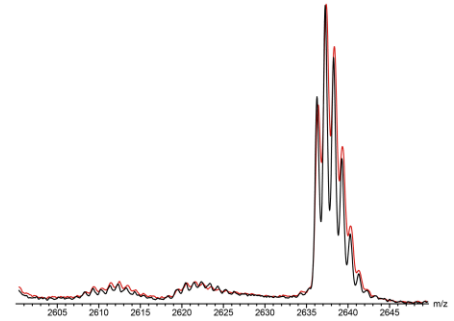

Biotin-Ahx-ARTKQTARKme1STGGKAPRKQLA  
H3 K9

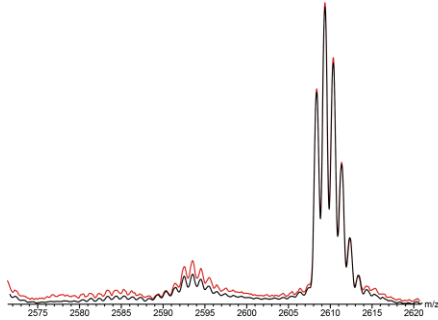

Biotin-Ahx-ARTKQTARKme2STGGKAPRKQLA  
H3 K9

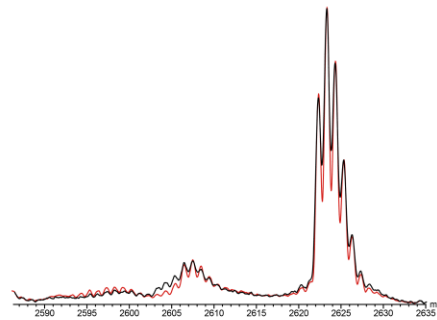

Biotin-Ahx-ARTKQTARKme2STGGKAPRKQLA  
H3 K9

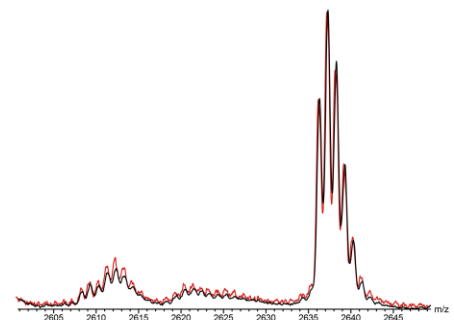

Biotin-Ahx-KAPRKQLATKAARKme1SAPATGG  
H3 K27

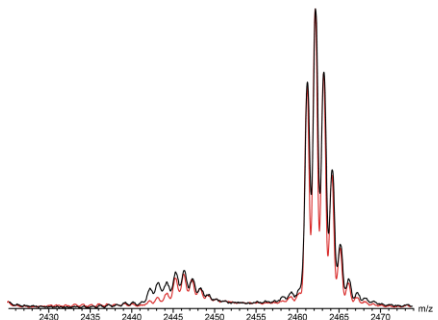

Biotin-Ahx-KAPRKQLATKAARKme2SAPATGG  
H3 K27

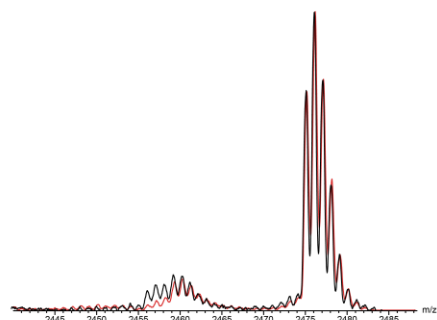

Biotin-Ahx-KAPRKQLATKAARKme2SAPATGG  
H3 K27

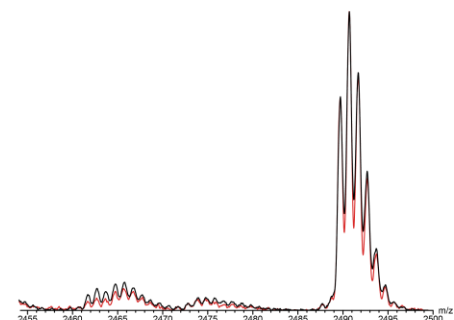

Biotin-Ahx-SAPATGGVme3KPHRYRPGTVAL  
H3 K36

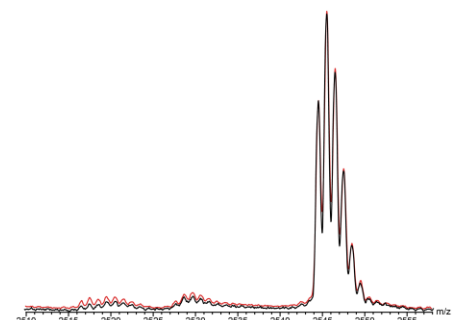

**Figure S8. Representative MALDI MS showing the absence of demethylation of histone peptides by NO66.<sup>6</sup>**

Peptide only assay (red) overlaid with enzyme reaction (black).

HLEVVKLLLEAGADVNAQDK  
Synthetic ankyrin

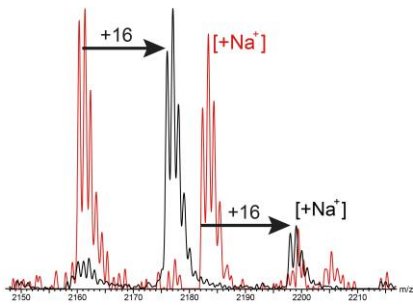

**Figure S9. Hydroxylation of synthetic ankyrin peptide by FIH.<sup>7</sup>** Peptide only assay (red) shown with enzyme reaction (black).

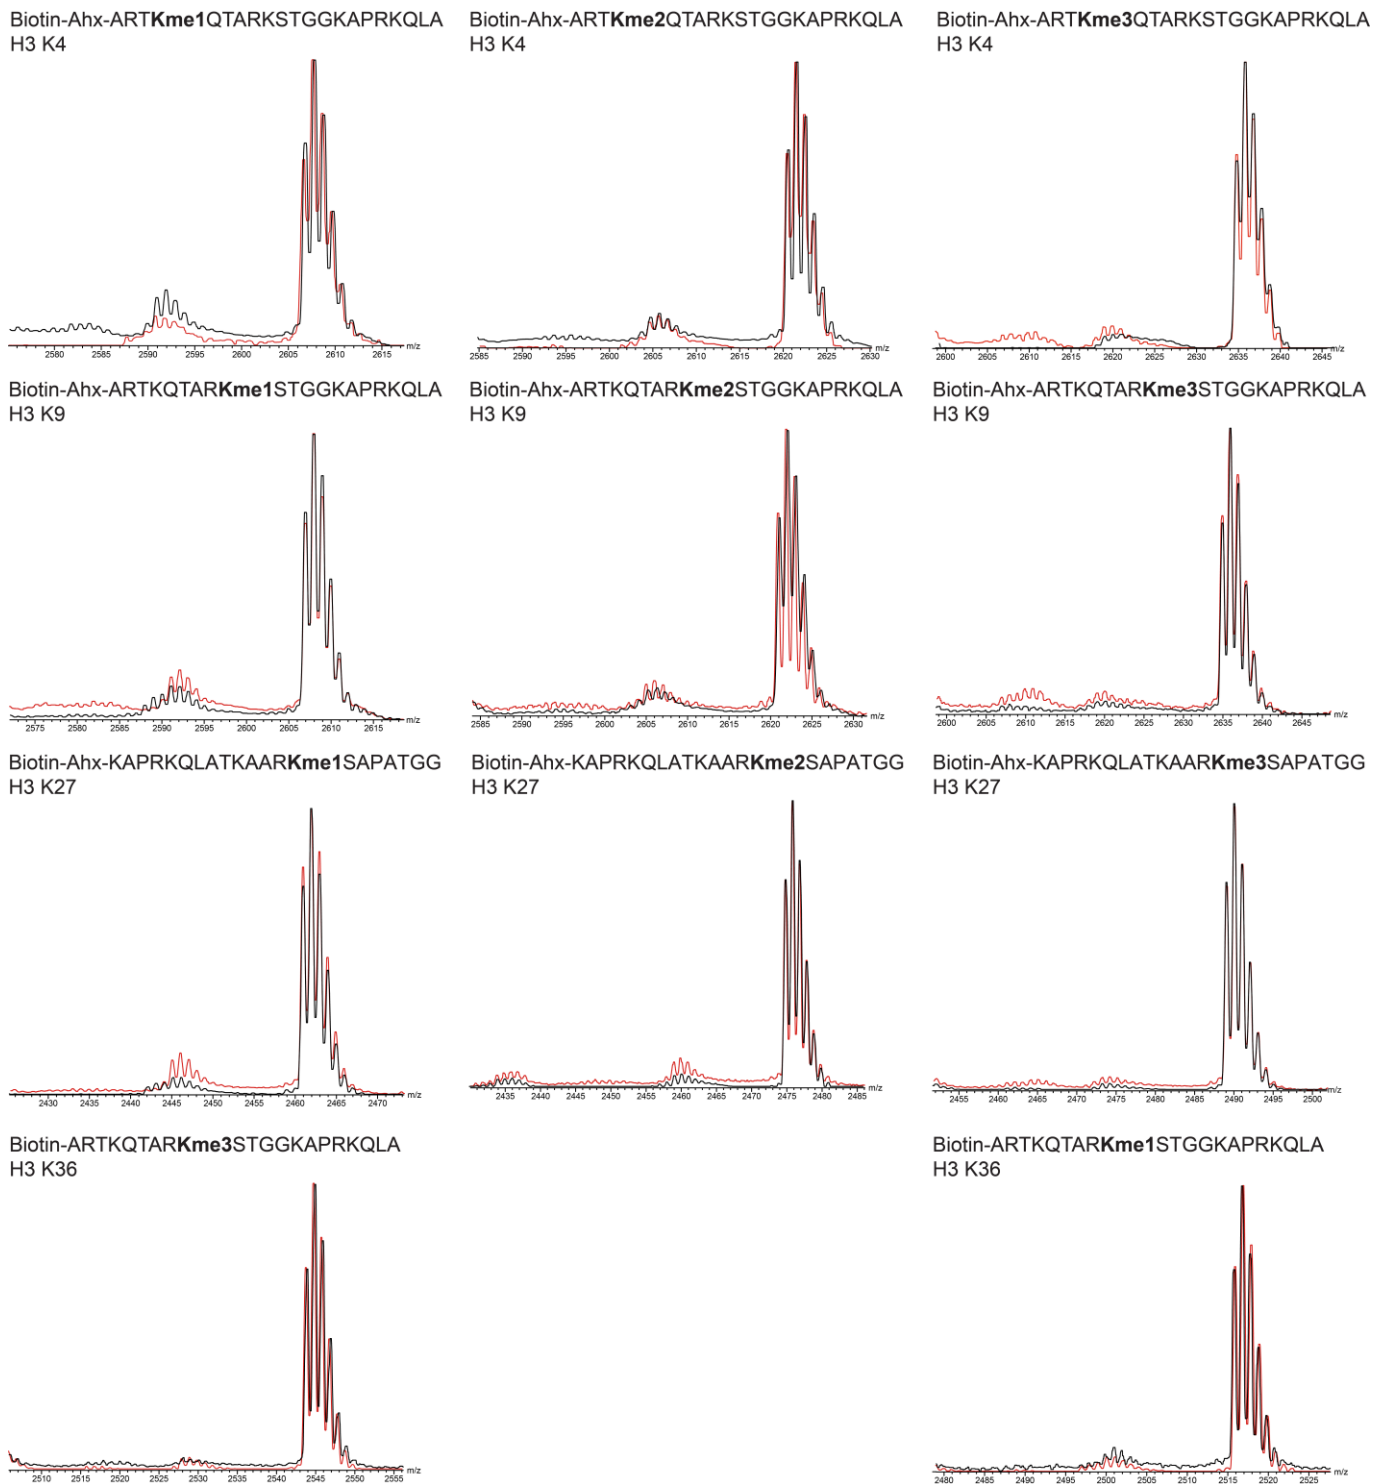

**Figure S10. Representative MALDI MS showing lack of demethylation of histone peptides by JMJD5.**

Peptide only assay (red) shown with enzyme reaction (black).

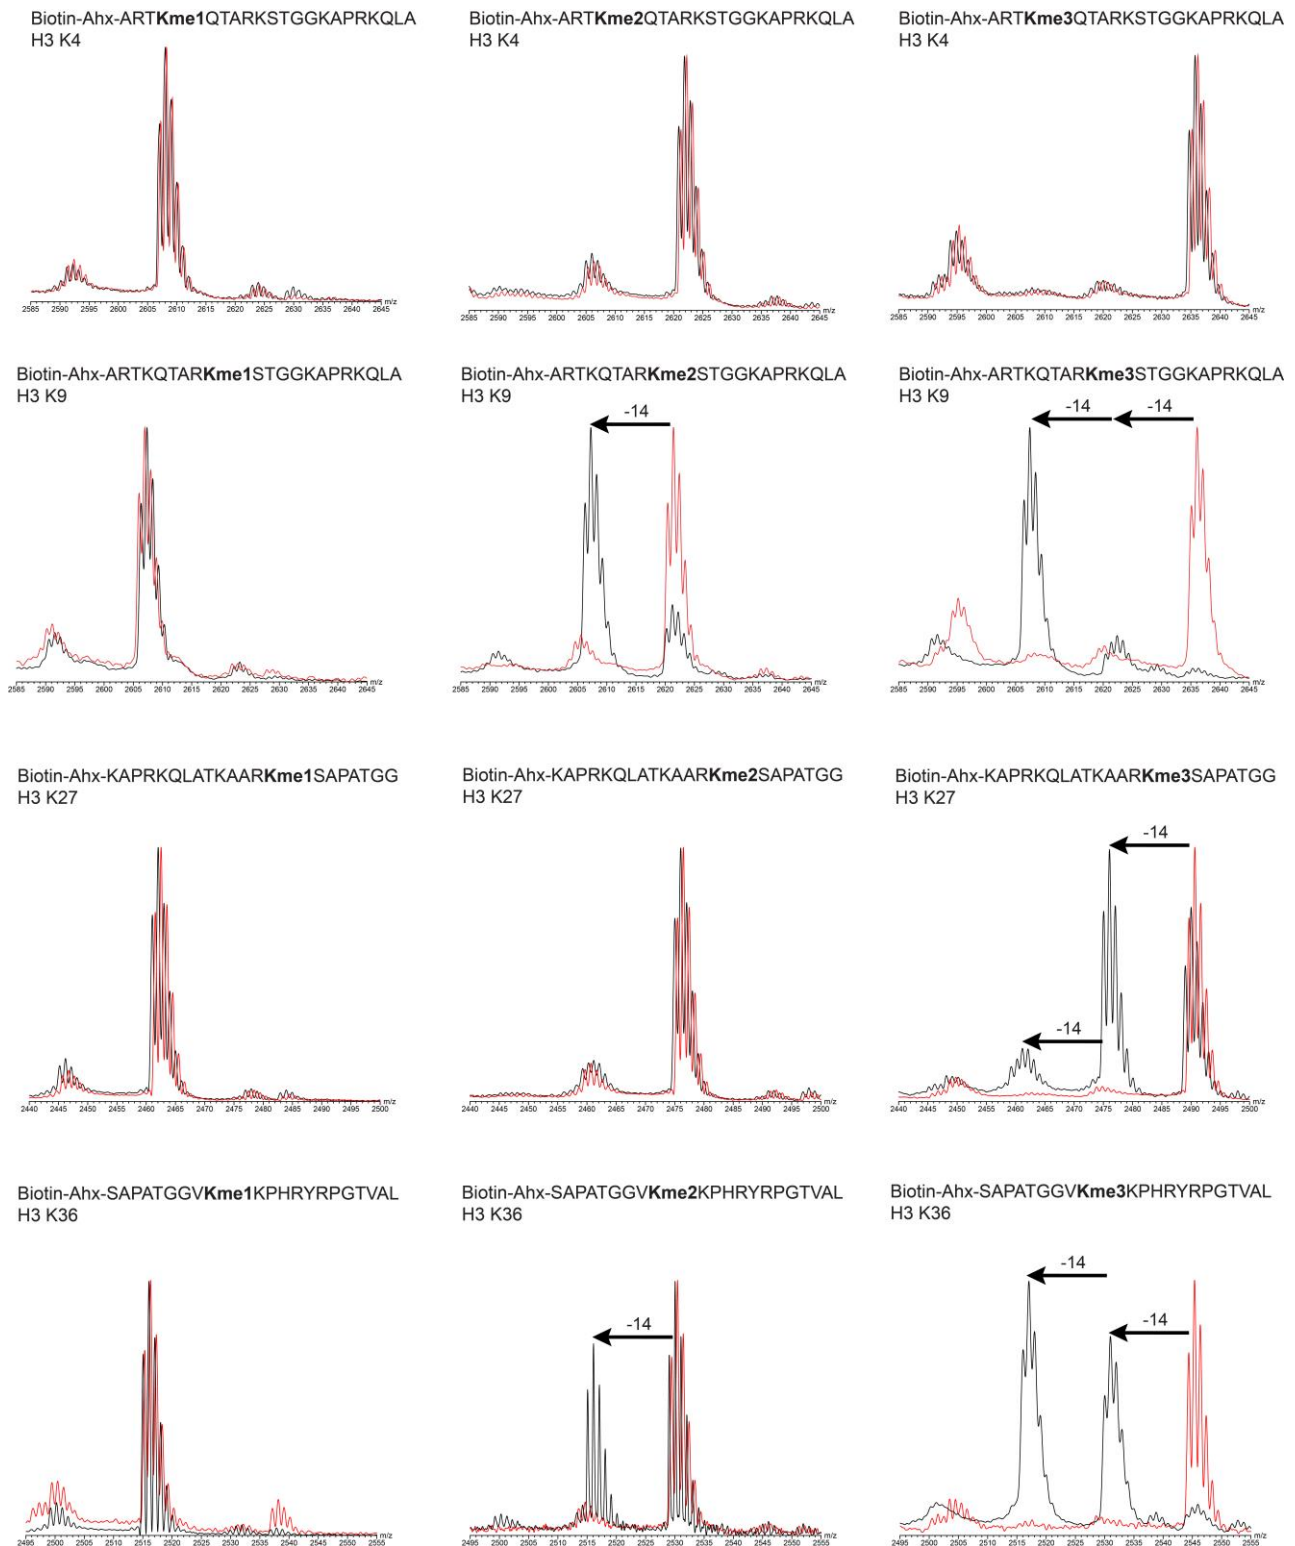

**Figure S11. Representative MALDI MS showing KDM4A-catalysed demethylation of H3 fragment peptides methylated at K4, K9, K27 and K36. Peptide only assay (red) overlaid with enzyme reaction (black).**

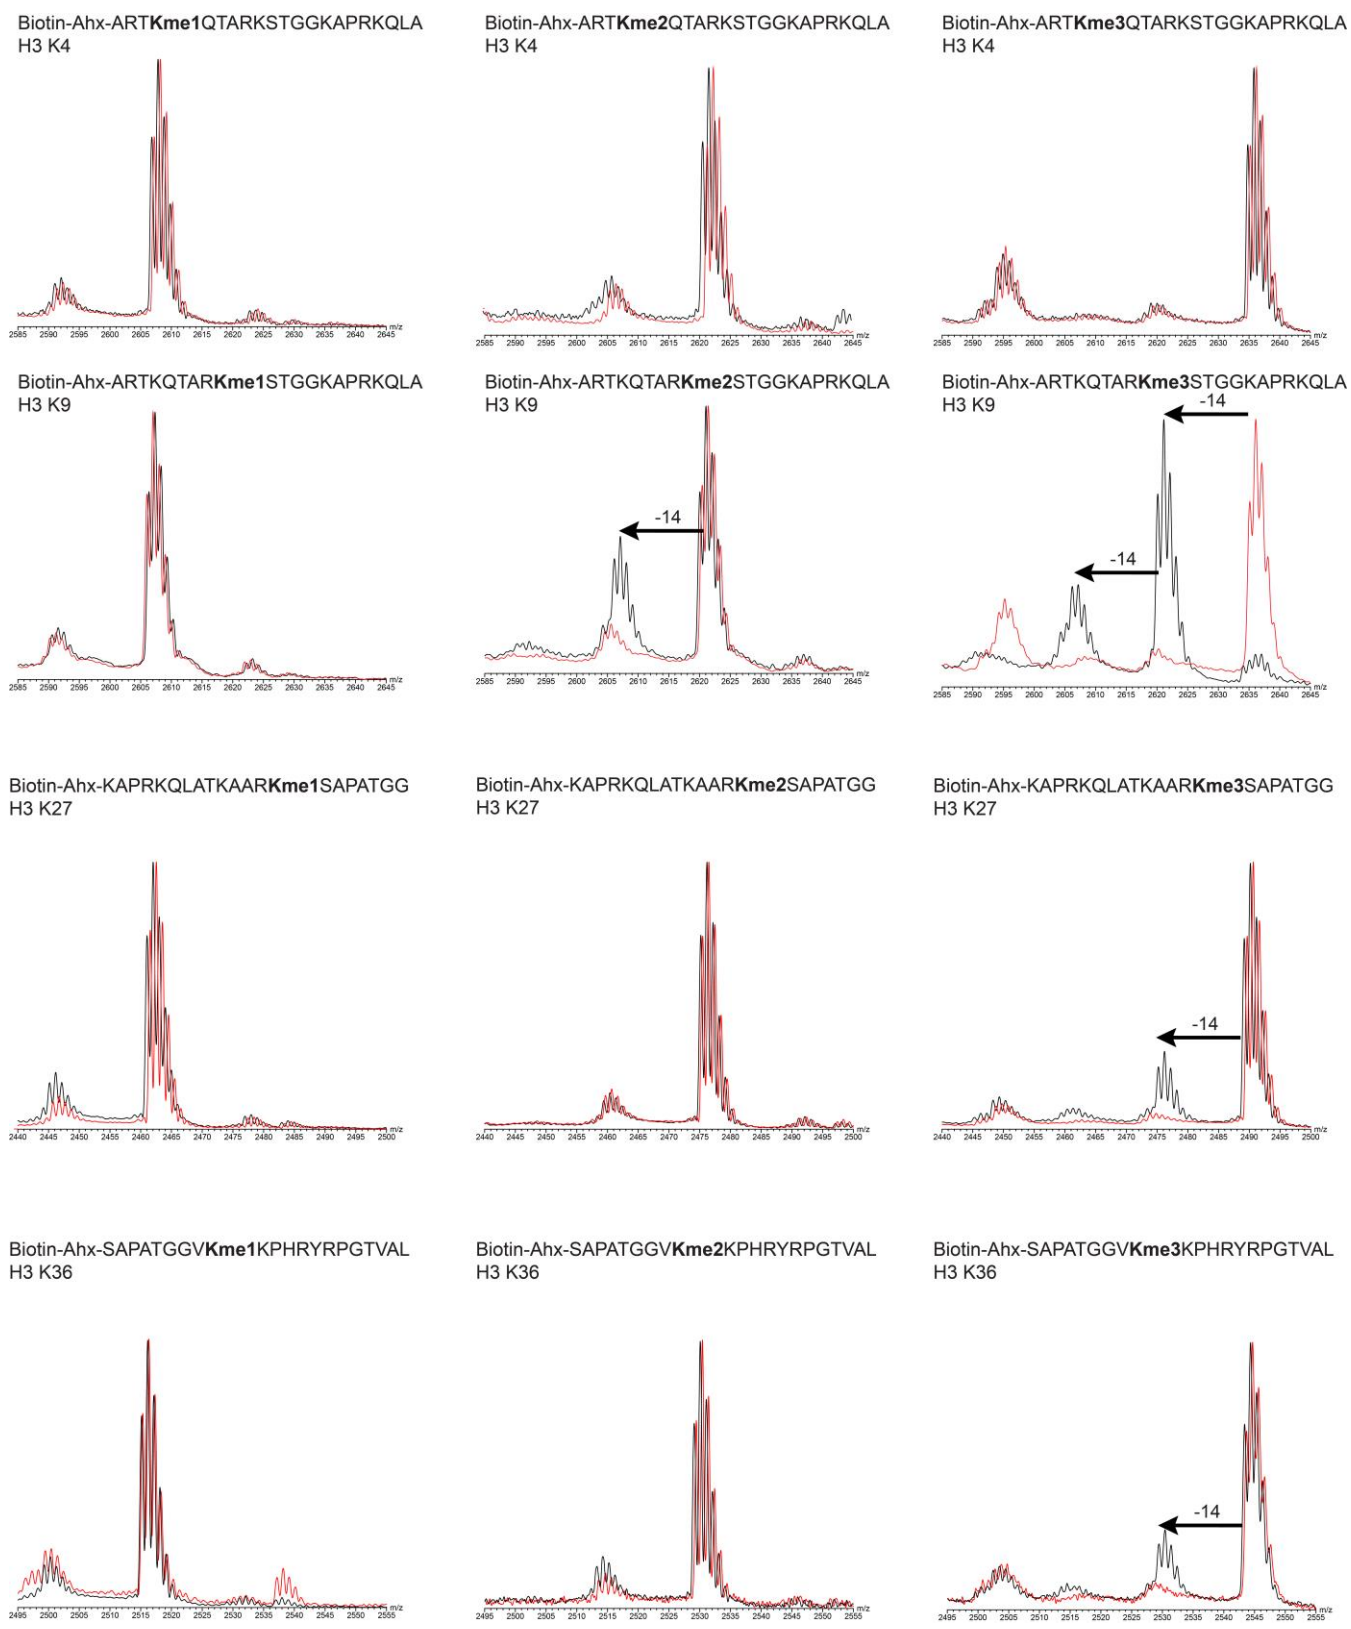

**Figure S12. Representative MALDI MS showing KDM4B-catalysed demethylation of H3 fragment peptides methylated t K9, K27 and K36. Peptide only assay (red) overlaid with enzyme reaction (black).**



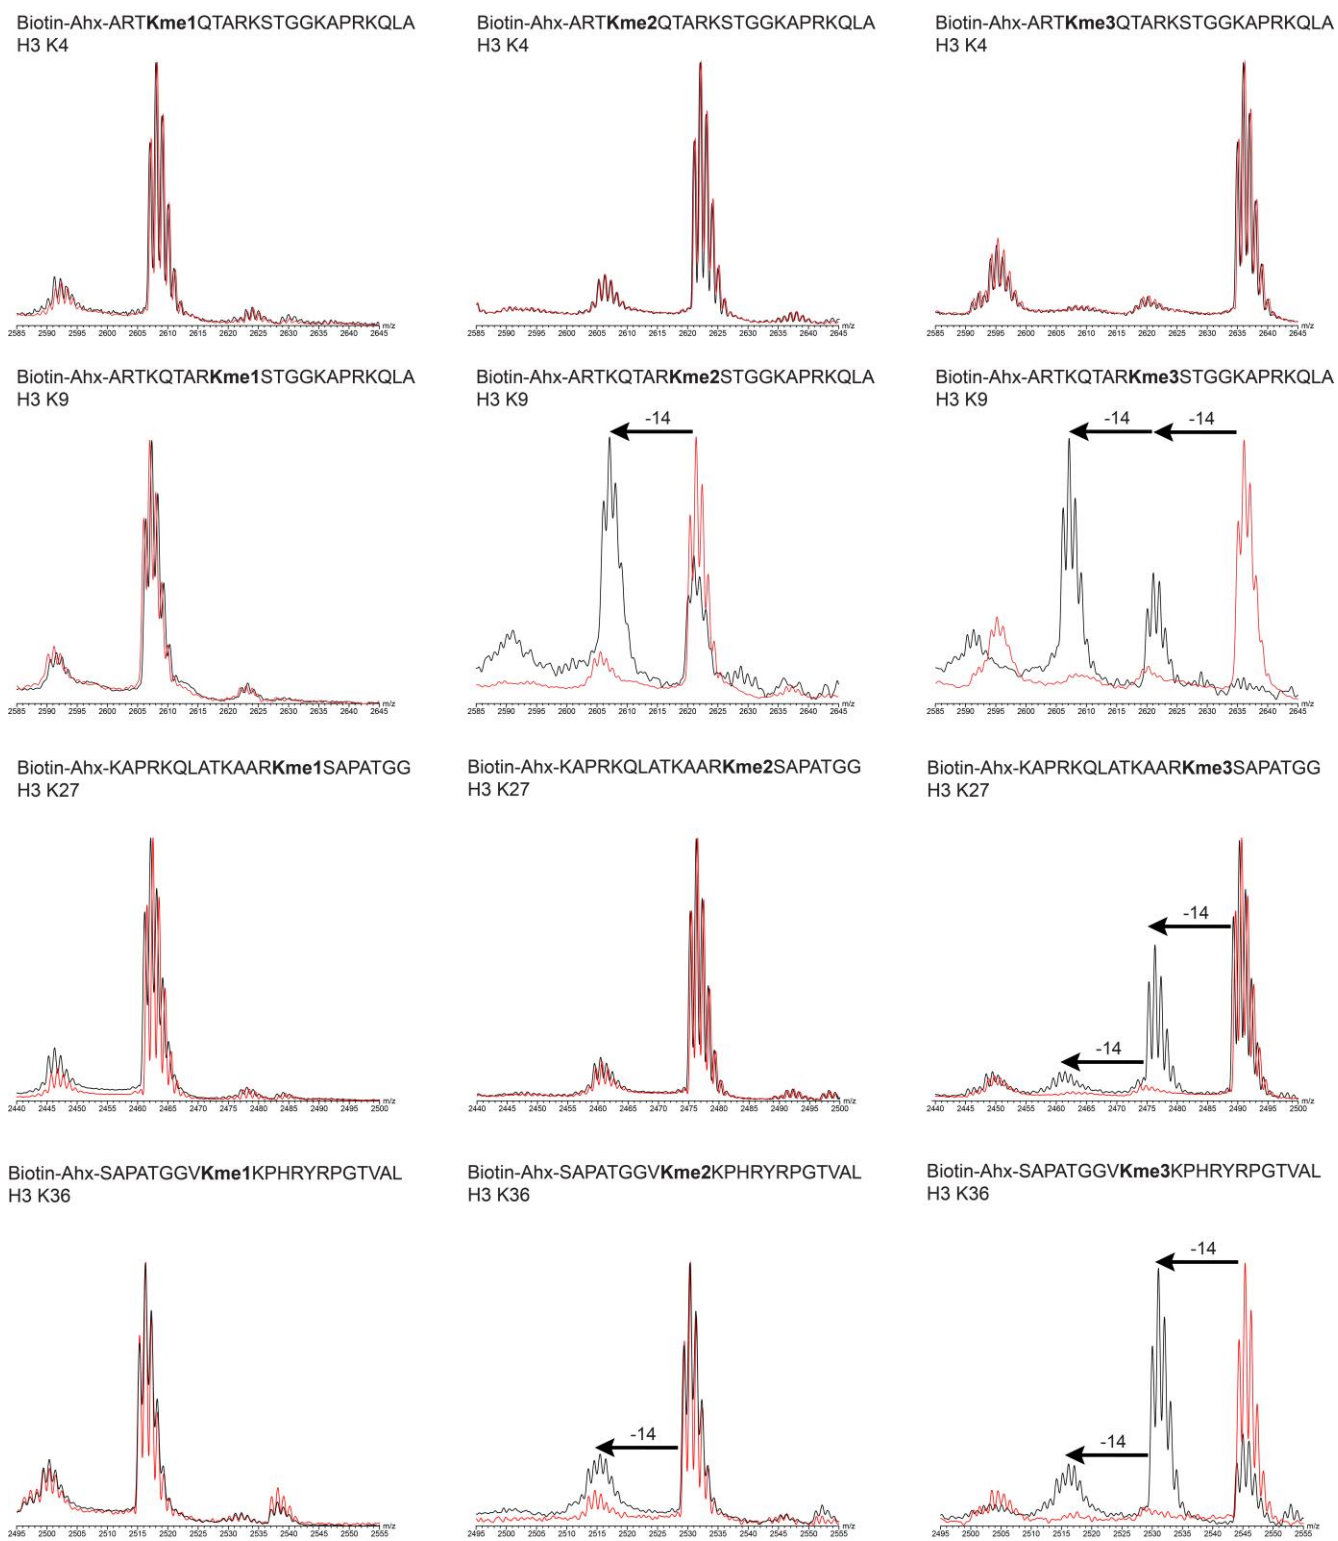

**Figure S13. Representative MALDI MS showing KDM4C-catalysed demethylation of H3 fragment peptides methylated at K9, K27 and K3. Peptide only assay (red) overlaid with enzyme reaction (black).**

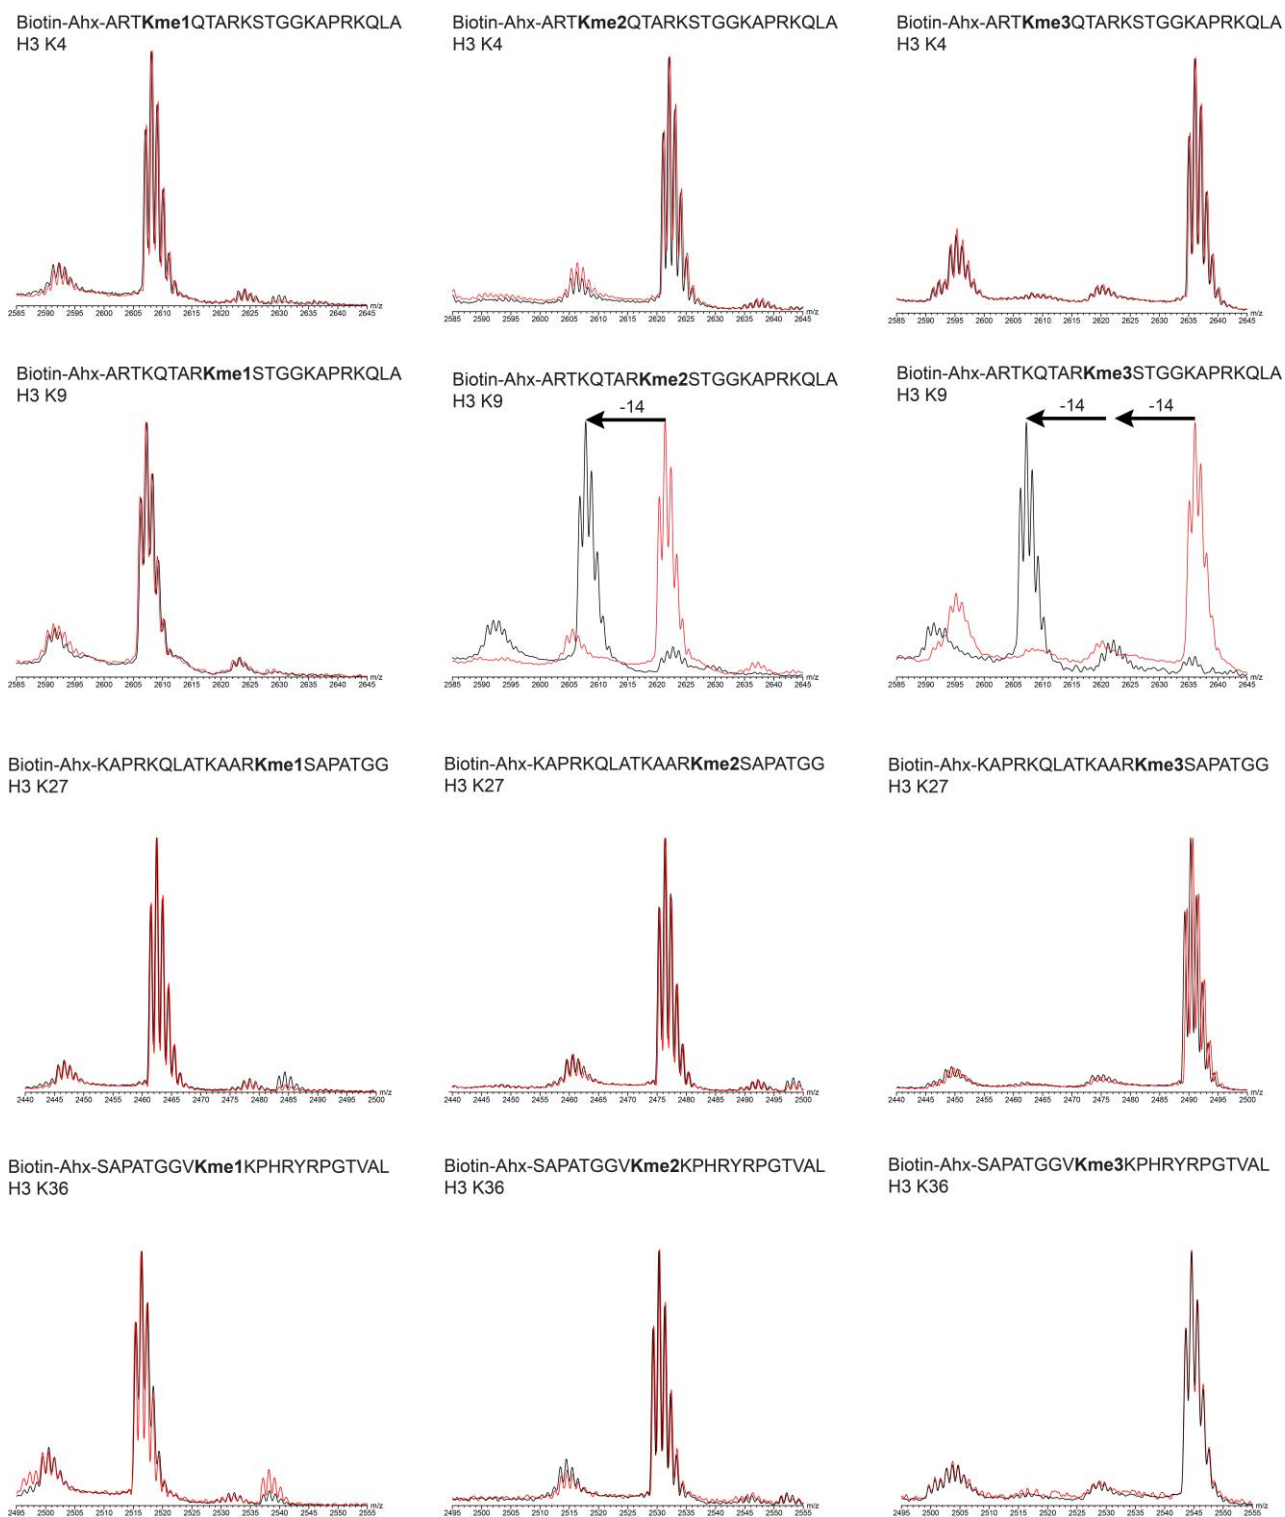

**Figure S14. Representative MALDI MS showing KDM4D-catalysed demethylation of H3 fragment peptides methylated at K9 and K27. Peptide only assay (red) overlaid with enzyme reaction (black).**

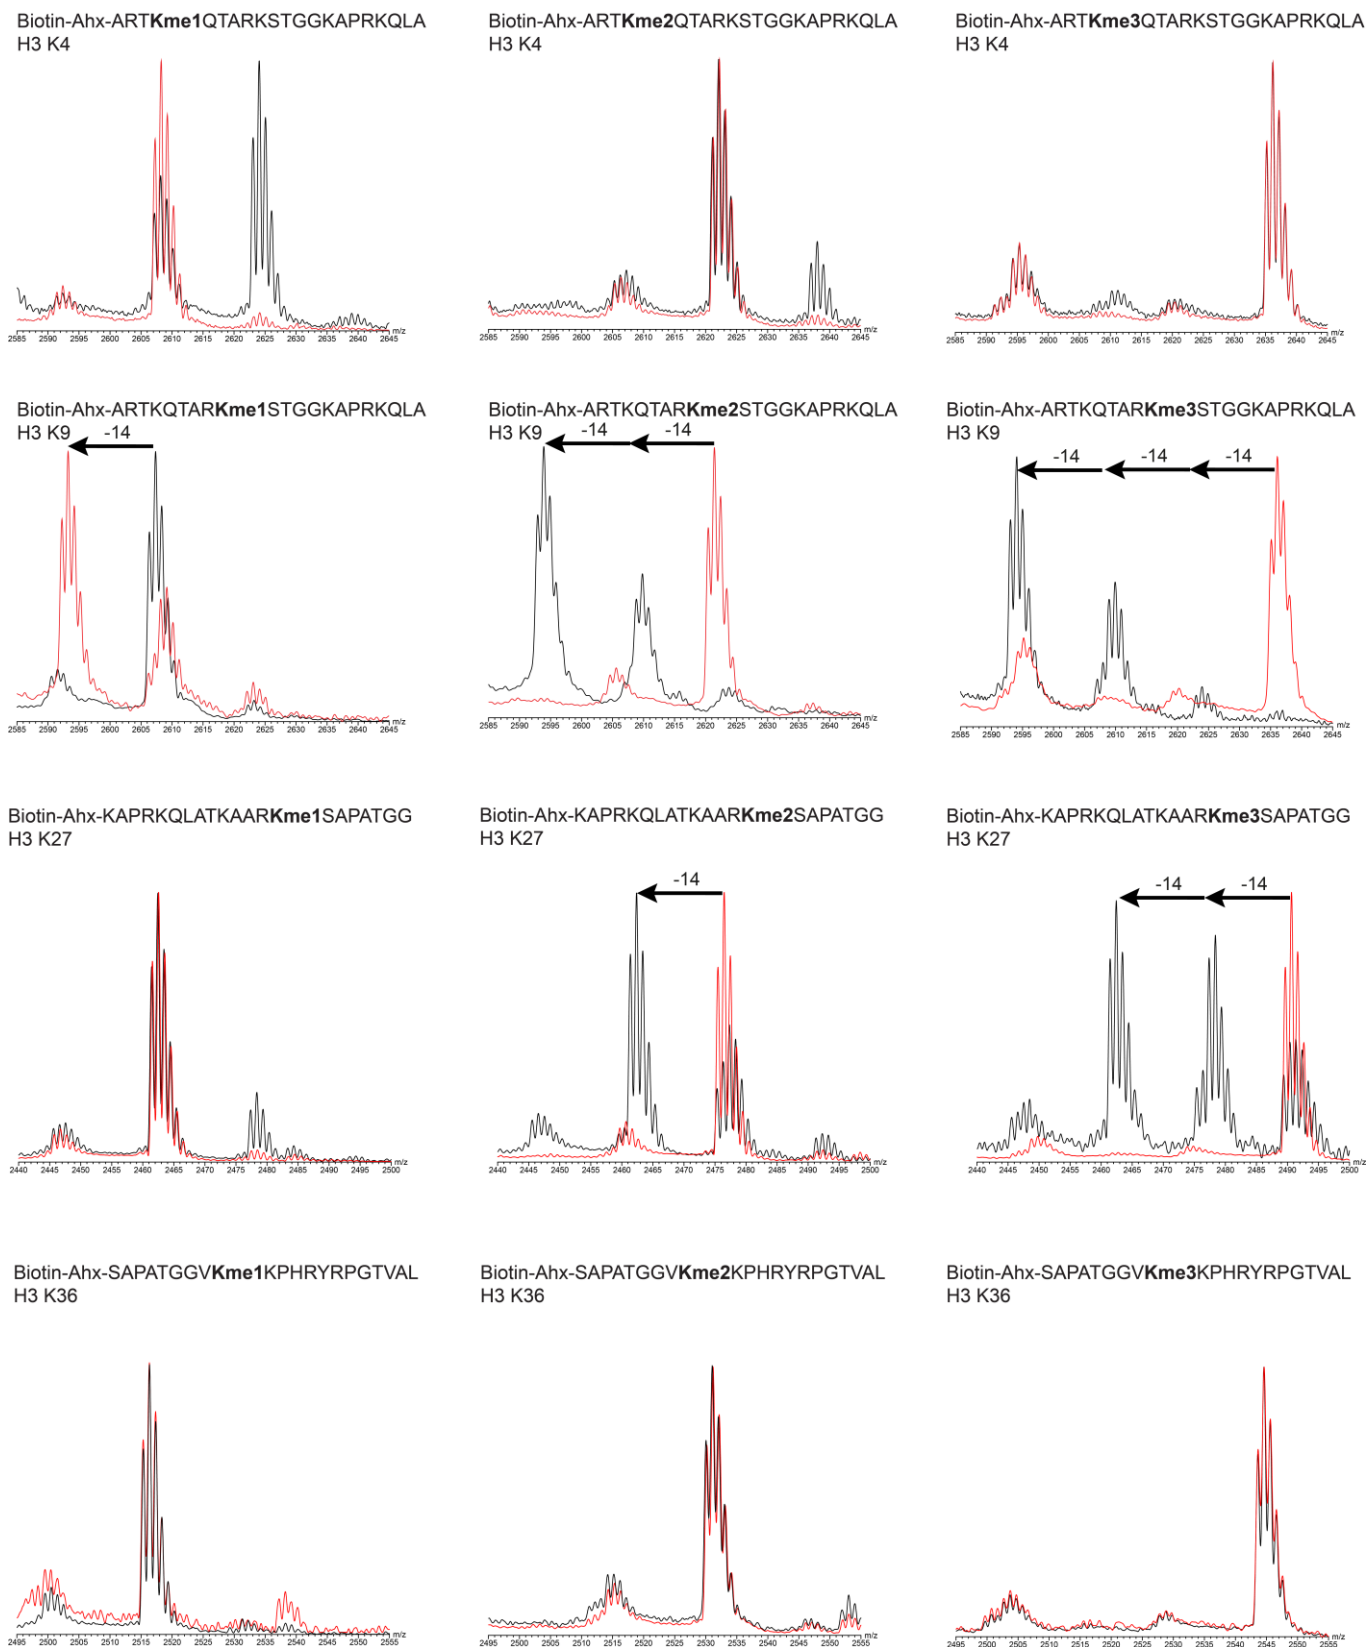

**Figure S15. Representative MALDI MS showing KDM4E-catalysed demethylation of H3 fragment peptides methylated at K9 and K27. Peptide only assay (red) overlaid with enzyme reaction (black).**

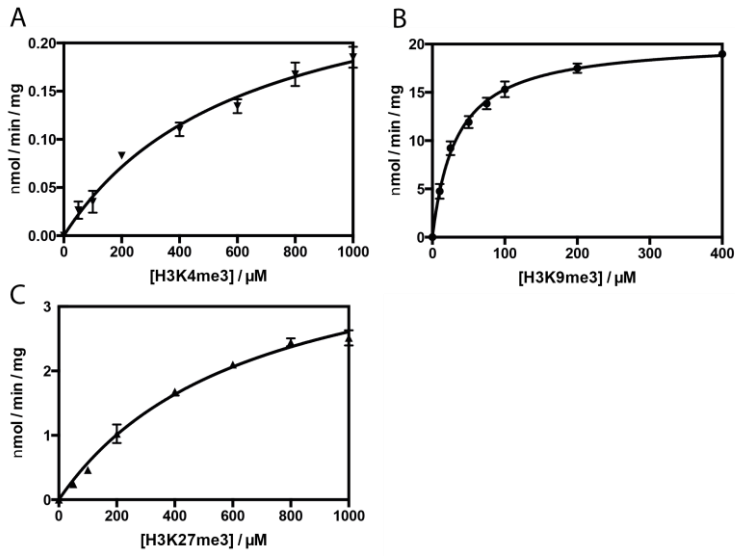

**Figure S16. Michaelis-Menten curves for KDM4A with histone H3 trimethylated peptides.** Initial rates over a range of peptide concentrations were determined using the FDH assay with saturating 2OG concentrations of 200  $\mu\text{M}$ .

(A)  
KDM4A

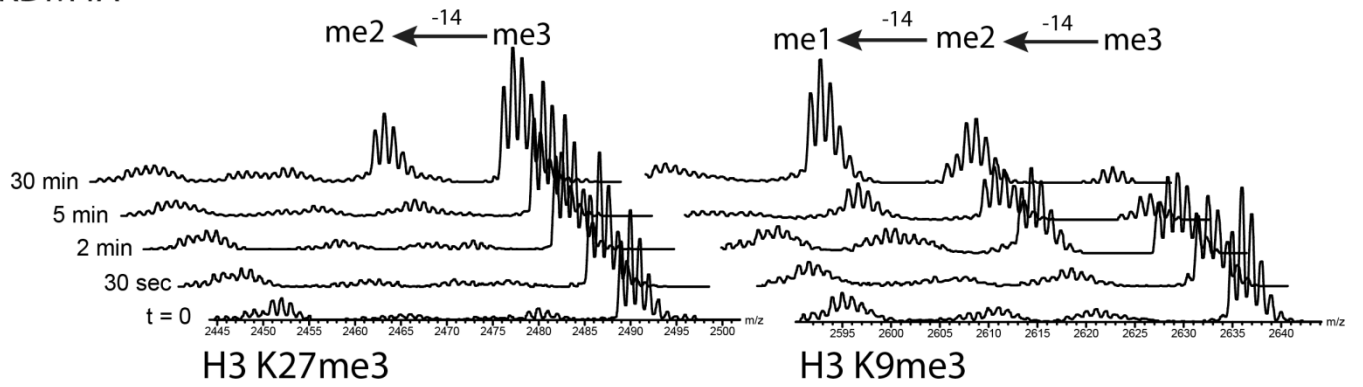

(B)  
KDM4A

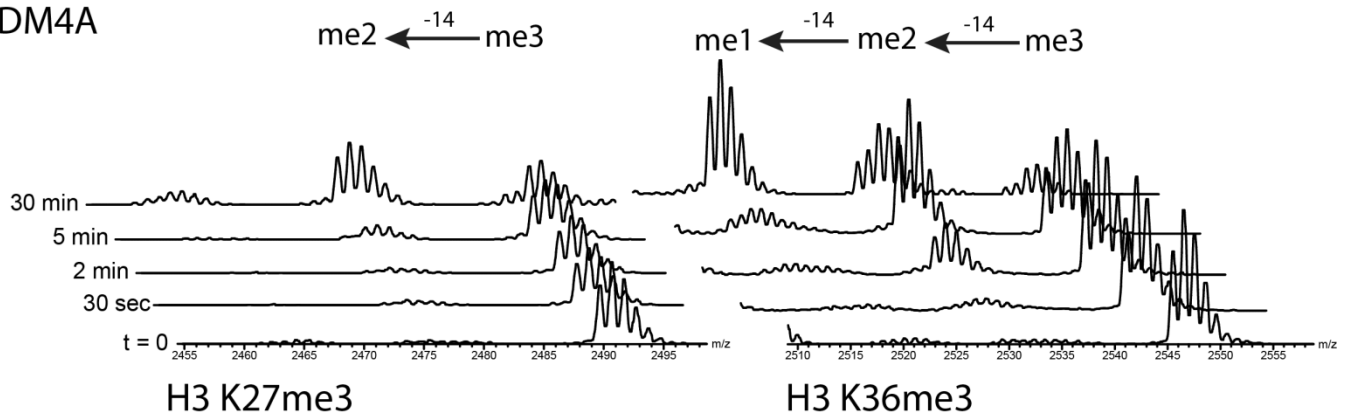

**Figure S17. Competition for demethylation by KDM4A between H3 K27me3 and (A) K9me3 or (B) K36me3 in a 1:1 concentration ratio, as analysed by MALDI MS.**

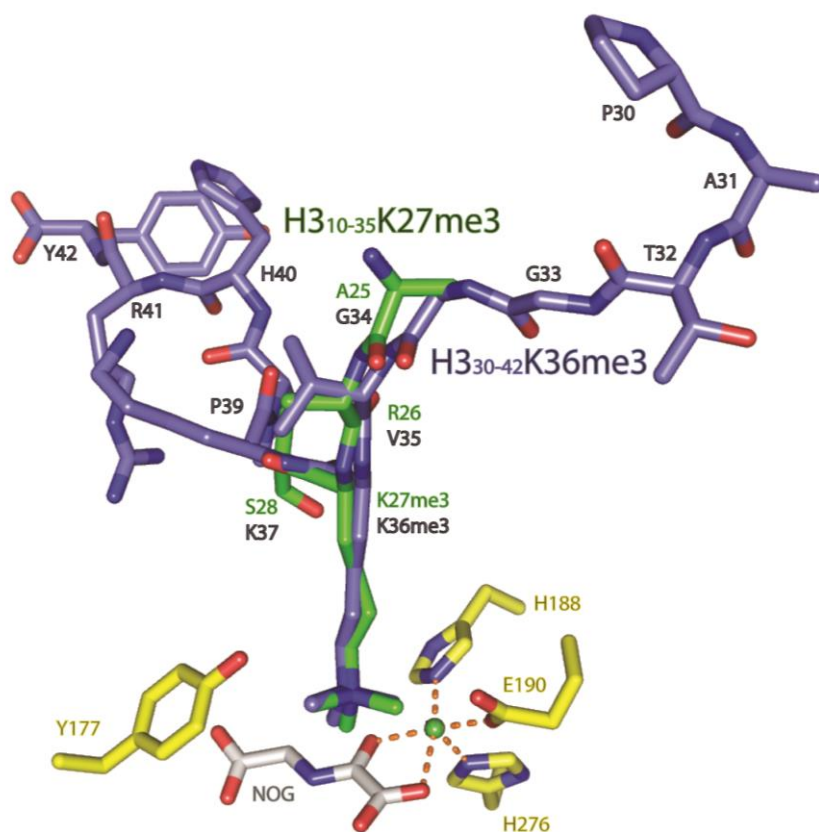

**Figure S18.** View from an X-ray crystal structure of the catalytic domain of KDM4A in complex with an H3K27me3 fragment peptide overlaid with H3<sub>30-42</sub>K36me3 (PDB ID: 2YBS). Nickel (Ni, green) and N-oxalylglycine (NOG, grey) substitute for iron (II) and 2OG, respectively. Active site residues from PDB 4V2W are shown in yellow (Tyr177, His188, Glu190, His276, Asp290). The position of the K27me3 residue of the fragment peptide correlates closely with that reported for H3K36me3, although the surrounding peptide sequence differs significantly (see peptide sequences in Figure 4).

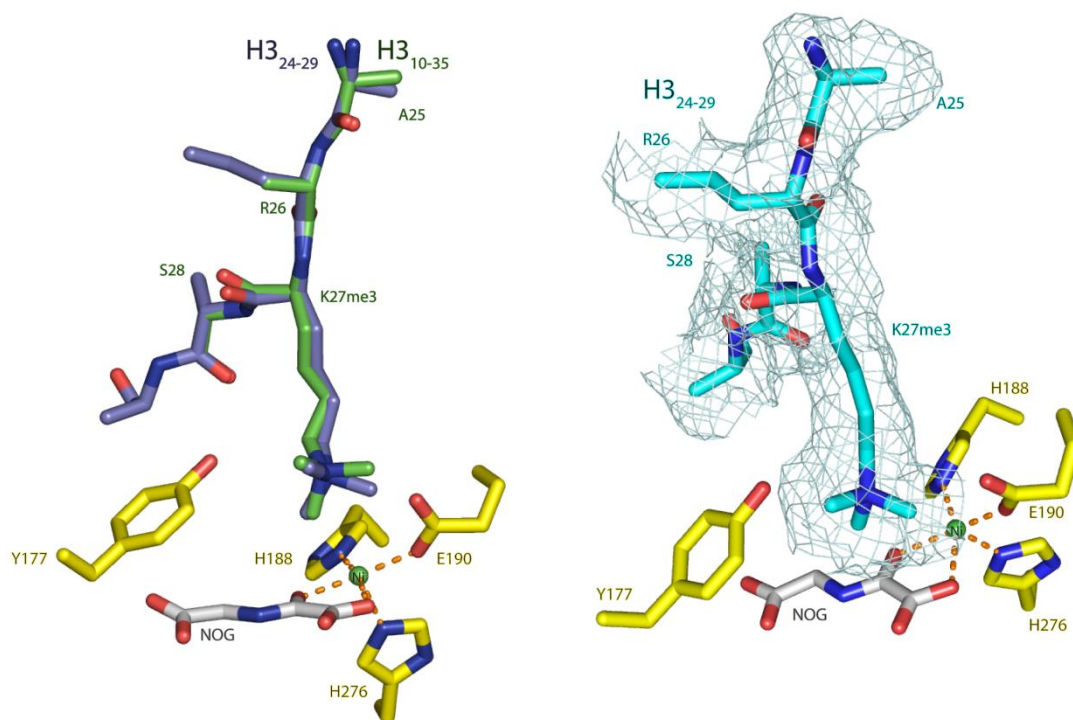

**Figure S19.** View from an X-ray crystal structure of KDM4A complexed with a shorter 5 residue H3<sub>10-35</sub> K27me3 peptide (purple/blue). The H3<sub>24-29</sub>K27 5 residue peptide (purple) is shown overlaid with the H3<sub>10-35</sub>K27 25 residue peptide (green). Nickel (Ni, green) and N-oxalylglycine (NOG, grey) substitute for iron (II) and 2OG, respectively. Active site residues from PDB 4V2V are shown in yellow (Tyr177, His188, Glu190, His276, Asp290).

## References

1. Ng SS, Kavanagh KL, McDonough MA, Butler D, Pilka ES, Lienard BM, Bray JE, Savitsky P, Gileadi O, von Delft F, et al. Crystal structures of histone demethylase JMJD2A reveal basis for substrate specificity. *Nature* 2007; 448:87-91.
2. Battye TG, Kontogiannis L, Johnson O, Powell HR, Leslie AG. iMOSFLM: a new graphical interface for diffraction-image processing with MOSFLM. *Acta crystallographica Section D, Biological crystallography* 2011; 67:271-81.
3. Winn MD, Ballard CC, Cowtan KD, Dodson EJ, Emsley P, Evans PR, Keegan RM, Krissinel EB, Leslie AG, McCoy A, et al. Overview of the CCP4 suite and current developments. *Acta crystallographica Section D, Biological crystallography* 2011; 67:235-42.
4. Adams PD, Afonine PV, Bunkoczi G, Chen VB, Davis IW, Echols N, Headd JJ, Hung LW, Kapral GJ, Grosse-Kunstleve RW, et al. PHENIX: a comprehensive Python-based system for macromolecular structure solution. *Acta crystallographica Section D, Biological crystallography* 2010; 66:213-21.
5. Horton JR, Upadhyay AK, Qi HH, Zhang X, Shi Y, Cheng X. Enzymatic and structural insights for substrate specificity of a family of jumonji histone lysine demethylases. *Nature structural & molecular biology* 2010; 17:38-43.
6. Ge W, Wolf A, Feng T, Ho CH, Sekirnik R, Zayer A, Granatino N, Cockman ME, Loenarz C, Loik ND, et al. Oxygenase-catalyzed ribosome hydroxylation occurs in prokaryotes and humans. *Nature chemical biology* 2012; 8:960-2.
7. Yang M, Ge W, Chowdhury R, Claridge TD, Kramer HB, Schmierer B, McDonough MA, Gong L, Kessler BM, Ratcliffe PJ, et al. Asparagine and aspartate hydroxylation of the cytoskeletal ankyrin family is catalyzed by factor-inhibiting hypoxia-inducible factor. *The Journal of biological chemistry* 2011; 286:7648-60.
